# Supplementary material
Source: publisher figshare collection journal article supplement (https://frontiersin.figshare.com/ndownloader/files/28007481)
Supplement: Supplementary file 1 [file 28007481]

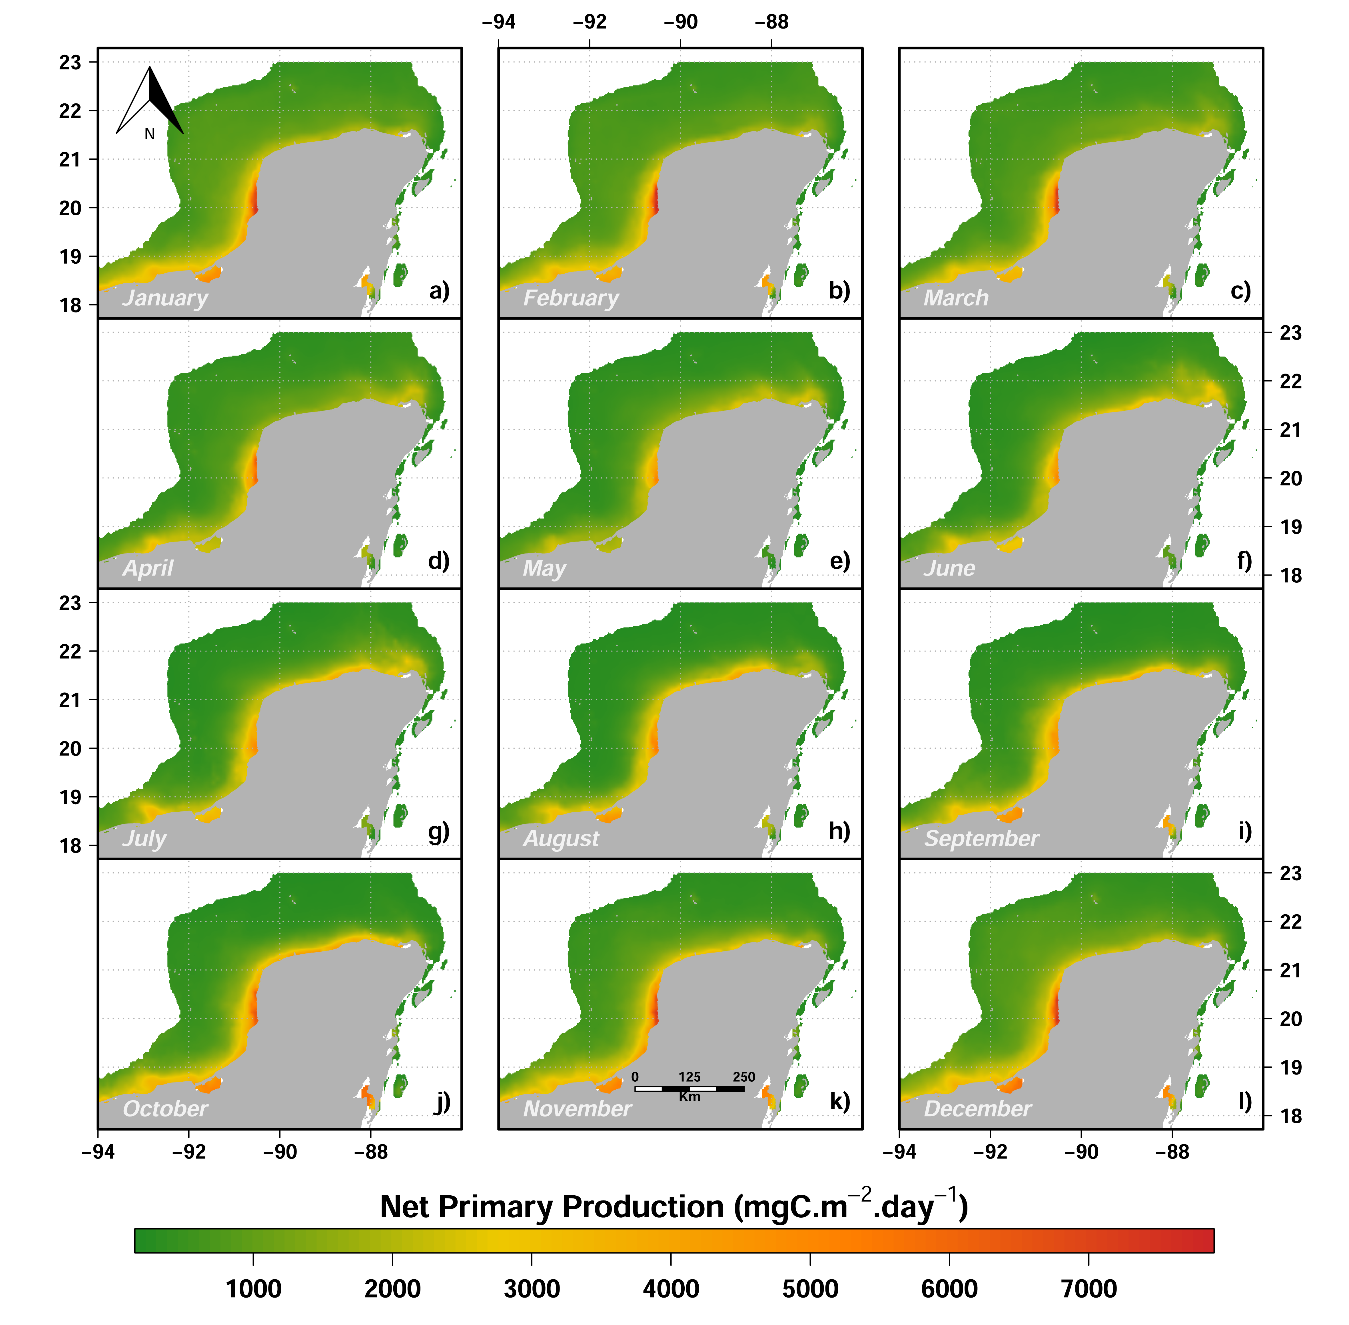


Figure S1. Average monthly values of Net primary production in the study region for the period 2010-2014. These layers were used to elaborate the predicted fishing grounds for the small-scale vessels.


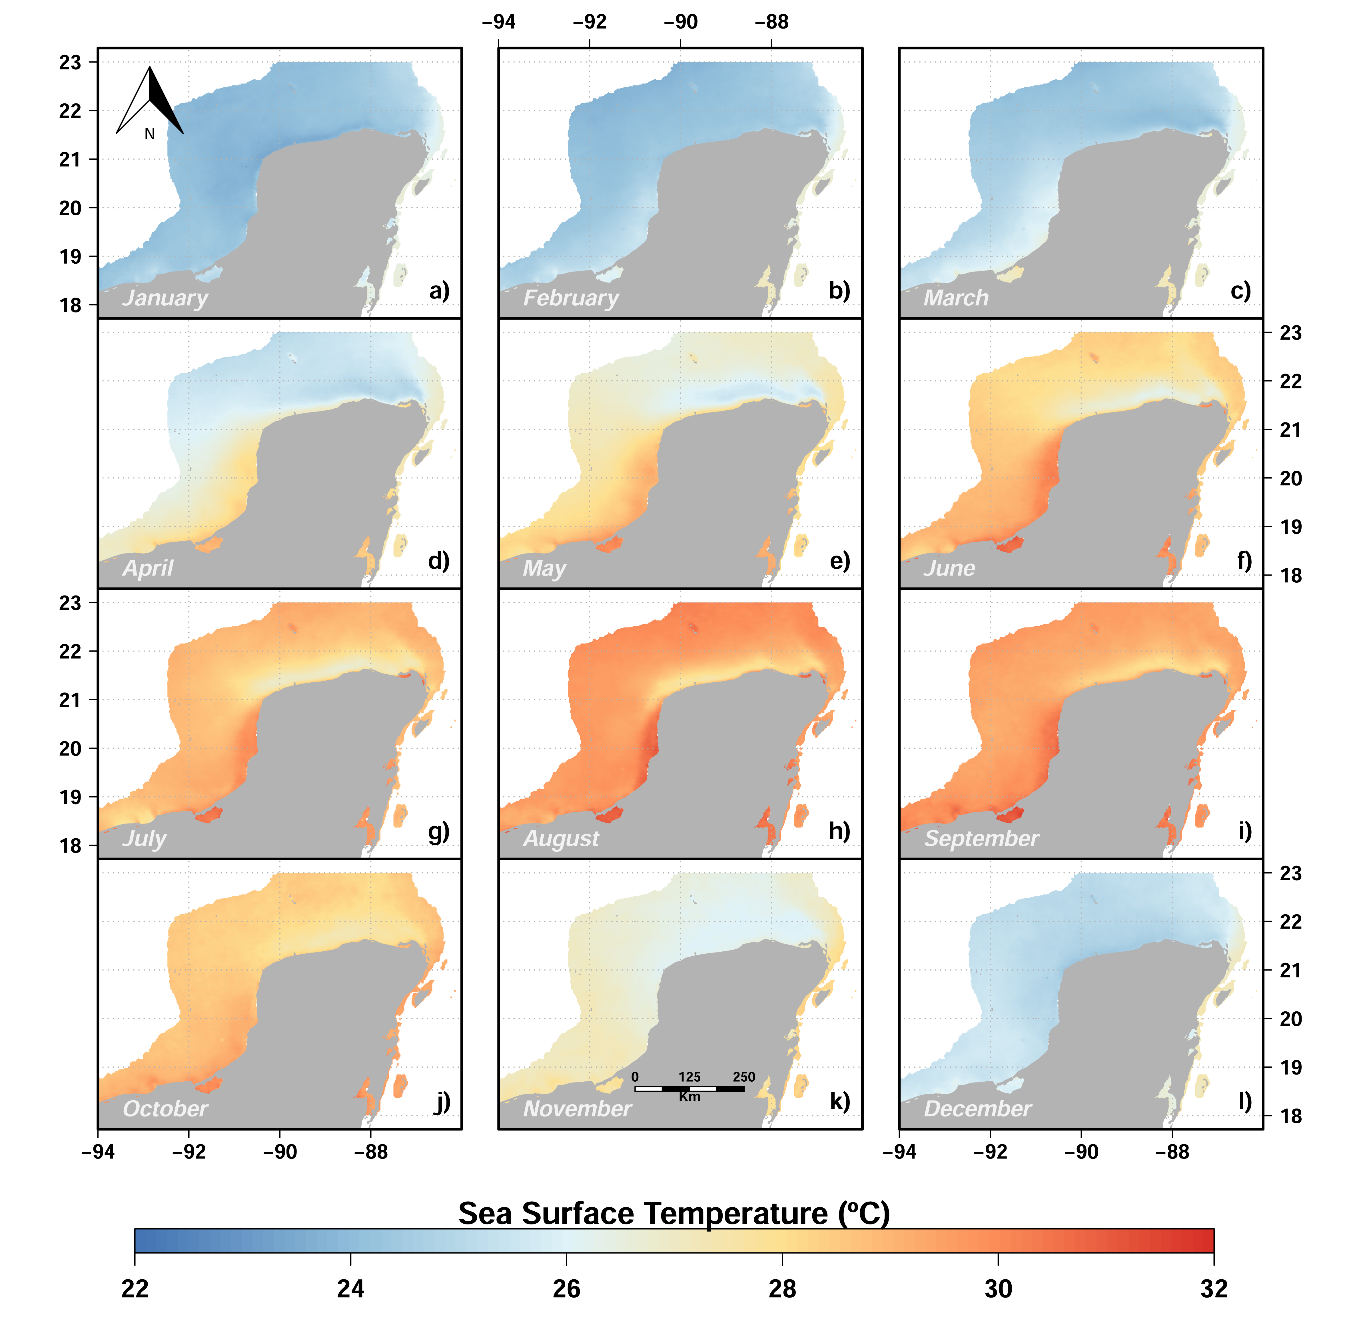


Figure S2. Average monthly values of Sea surface temperature in the study region for the period 2010-2014. These layers were used to elaborate the predicted fishing grounds for the small-scale vessels.


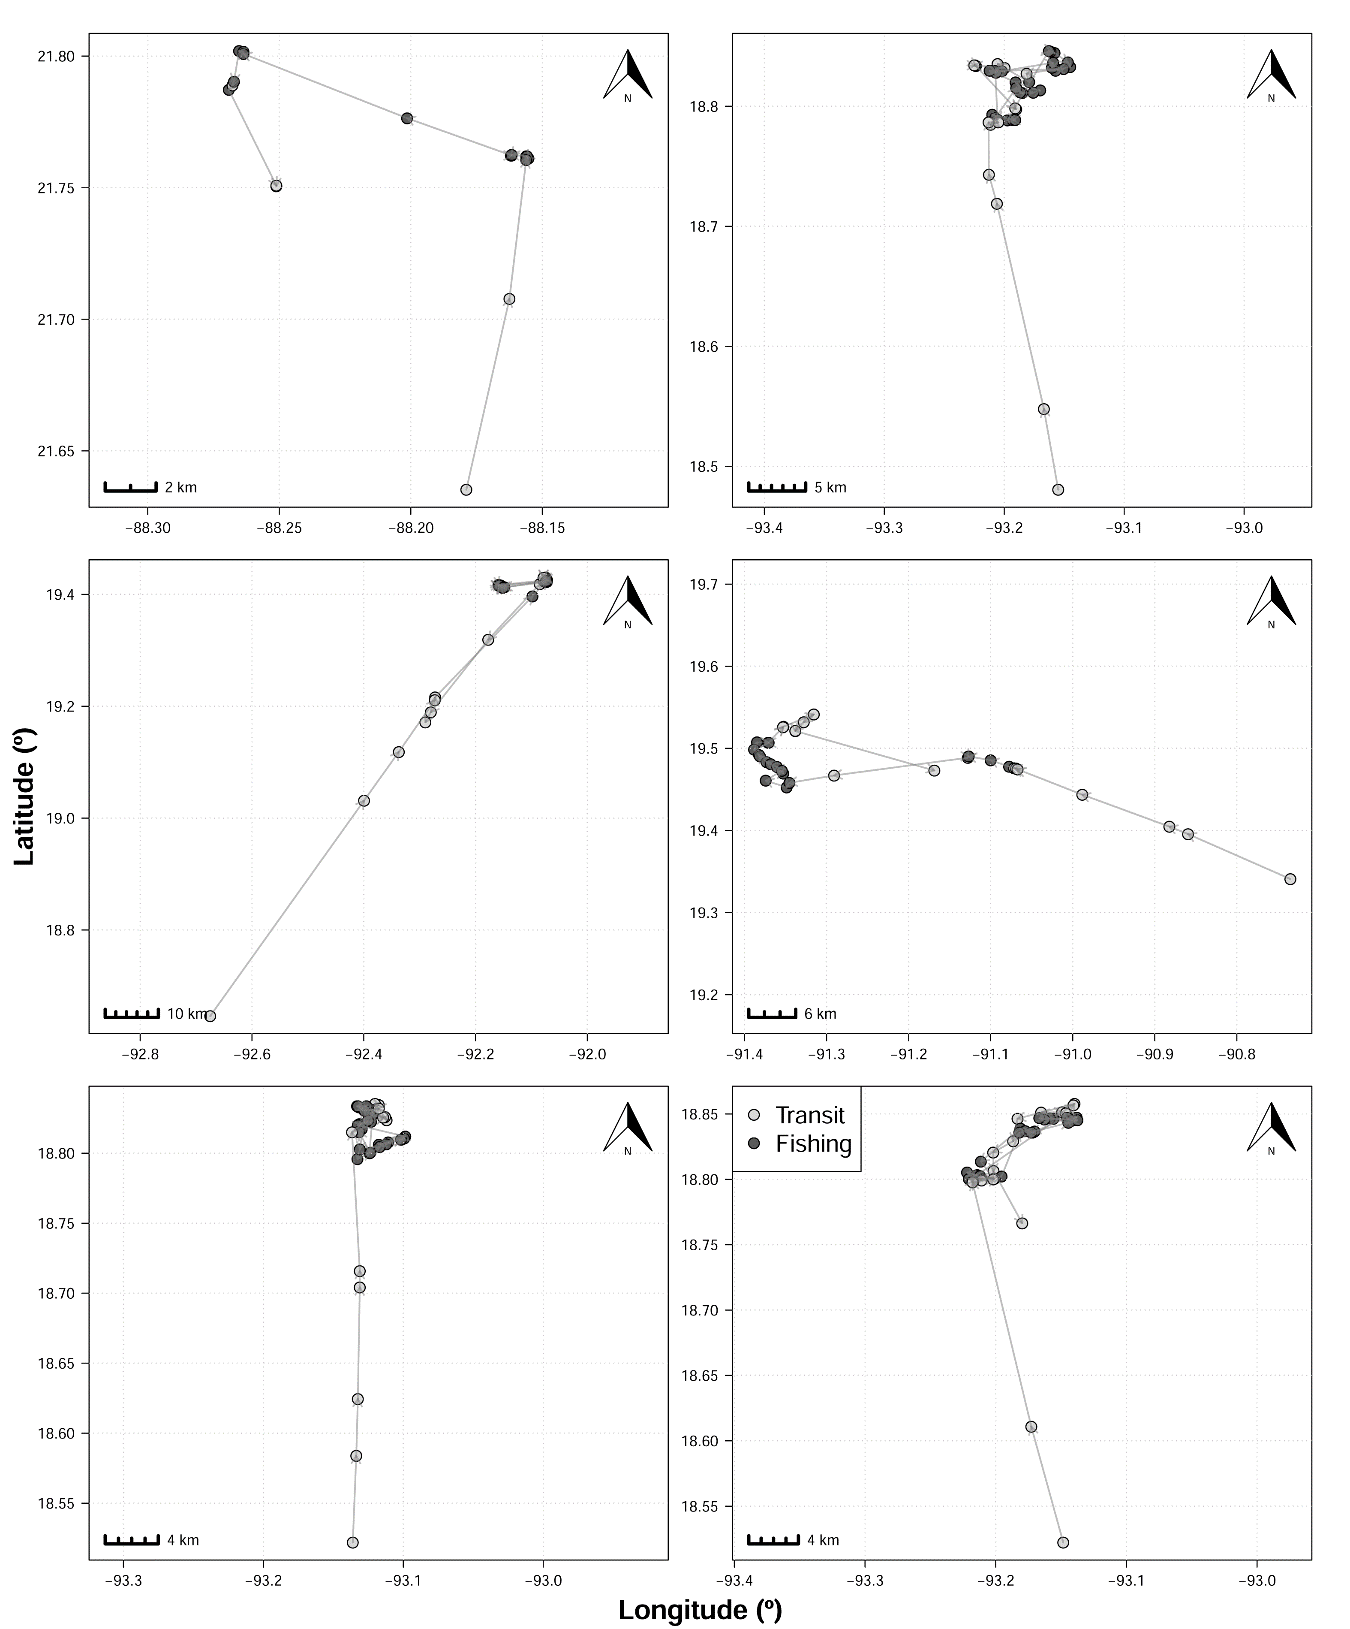


Figure S3. Examples of VMS trajectories classified by the Random forest model trained with observers’ data to differentiate between transit and fishing activities.
